# Supplementary material for: Repeat-encoded poly-Q tracts show statistical commonalities across species
Source: PubMed Central journal article supplement (PMC3617014; doi:10.1186/1471-2164-14-76), 2013-02-02

Supplementary Figure 2

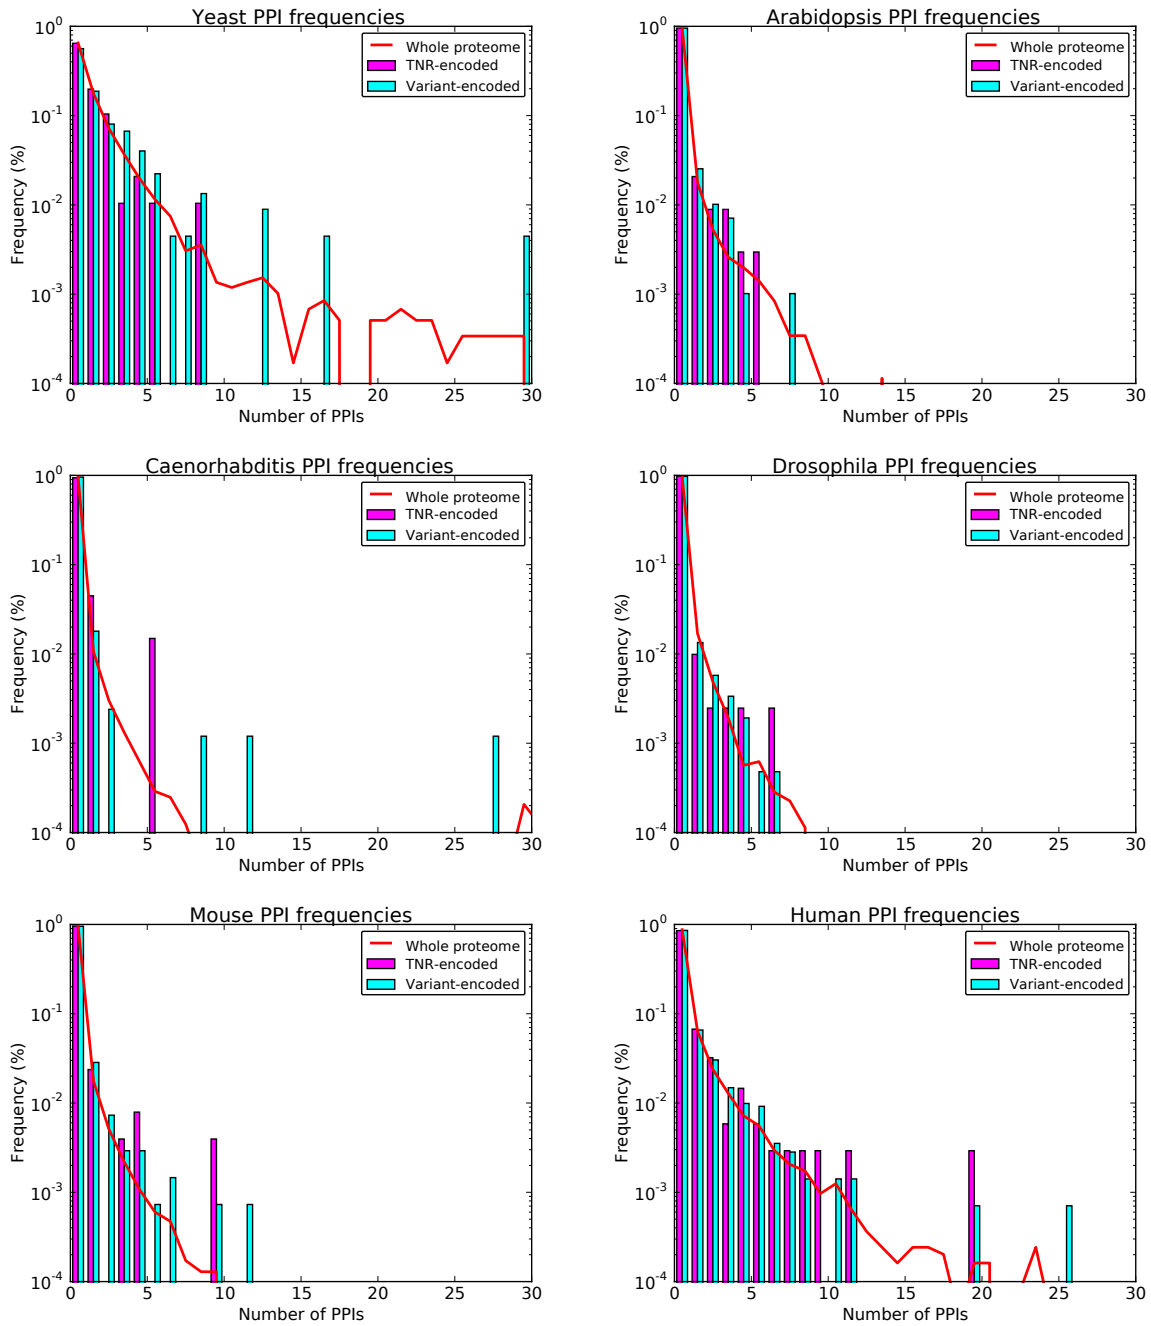

Supplement: 1471-2164-14-76-S2.pdf [file 1471-2164-14-76-S2.pdf]
