# Supplementary material for: Repeat-encoded poly-Q tracts show statistical commonalities across species
Source: PubMed Central journal article supplement (PMC3617014; doi:10.1186/1471-2164-14-76), 2013-02-02
Supplement: 1471-2164-14-76-S4.pdf [file 1471-2164-14-76-S4.pdf]

**Supplementary Table 2**

| <i>Saccharomyces cerevisiae</i> |                |                |          | <i>Arabidopsis thaliana</i>    |                |                |          |
|---------------------------------|----------------|----------------|----------|--------------------------------|----------------|----------------|----------|
| Amino acid                      | Triplet length | Variant length | p-value  | Amino acid                     | Triplet length | Variant length | p-value  |
| A                               | 8.50 (0.50)    | 8.27 (0.24)    | 4.15e-01 | A                              | 7.00 (0.00)    | 8.17 (0.32)    | 1.06e-01 |
| D                               | 13.25 (2.49)   | 9.19 (0.53)    | 9.00e-02 | D                              | 9.97 (0.68)    | 8.12 (0.26)    | 2.11e-02 |
| E                               | 9.82 (0.98)    | 8.92 (0.56)    | 1.08e-01 | E                              | 10.42 (0.88)   | 7.90 (0.12)    | 8.98e-05 |
| G                               | na ( na)       | 7.00 (0.00)    | na       | G                              | 9.17 (0.95)    | 8.35 (0.15)    | 1.32e-01 |
| H                               | 8.00 (0.00)    | 8.00 (0.67)    | 1.82e-01 | H                              | 8.62 (0.80)    | 8.64 (0.56)    | 4.70e-01 |
| K                               | 8.00 (0.00)    | 7.60 (0.60)    | 9.57e-02 | K                              | 7.84 (0.27)    | 7.53 (0.17)    | 1.37e-01 |
| L                               | na ( na)       | na (na)        | na       | L                              | 7.00 (0.00)    | 7.42 (0.23)    | na       |
| N                               | 11.82 (0.85)   | 10.35 (0.98)   | 4.70e-02 | N                              | 9.52 (0.56)    | 7.30 (0.12)    | 3.06e-04 |
| P                               | 7.50 (0.50)    | 8.77 (0.43)    | 1.28e-01 | P                              | 9.33 (0.49)    | 8.44 (0.18)    | 2.26e-02 |
| Q                               | 12.62 (1.44)   | 10.65 (0.44)   | 1.49e-01 | Q                              | 9.91 (0.71)    | 8.73 (0.25)    | 7.13e-02 |
| S                               | 14.00 (2.38)   | 8.63 (0.31)    | 1.07e-03 | S                              | 8.74 (0.21)    | 8.20 (0.10)    | 1.34e-04 |
| T                               | 8.00 (0.00)    | 7.00 (0.00)    | na       | T                              | 7.60 (0.40)    | 8.30 (0.29)    | 7.06e-02 |
| <i>Caenorhabditis elegans</i>   |                |                |          | <i>Drosophila melanogaster</i> |                |                |          |
| Amino acid                      | Triplet length | Variant length | p-value  | Amino acid                     | Triplet length | Variant length | p-value  |
| A                               | 8.12 (0.44)    | 7.95 (0.18)    | 1.90e-01 | A                              | 9.65 (0.52)    | 8.99 (0.08)    | 2.16e-01 |
| D                               | 9.00 (1.00)    | 7.81 (0.12)    | 9.64e-02 | D                              | 9.38 (0.91)    | 7.95 (0.18)    | 5.77e-02 |
| E                               | 11.00 (1.34)   | 7.78 (0.24)    | 3.75e-04 | E                              | 7.69 (0.24)    | 9.83 (0.94)    | 1.98e-01 |
| G                               | 9.57 (1.19)    | 7.85 (0.11)    | 8.94e-02 | G                              | 10.71 (0.60)   | 8.56 (0.11)    | 4.69e-05 |
| H                               | 7.50 (0.50)    | 7.29 (0.11)    | 2.32e-01 | H                              | 7.73 (0.25)    | 8.62 (0.18)    | 3.54e-02 |
| K                               | 10.00 (3.00)   | 7.59 (0.17)    | 2.79e-01 | K                              | 7.00 (0.00)    | 7.18 (0.10)    | na       |
| L                               | 7.00 (0.00)    | 7.77 (0.26)    | na       | L                              | na ( na)       | 7.40 (0.27)    | na       |
| N                               | 8.25 (0.95)    | 7.96 (0.24)    | 4.88e-01 | N                              | 10.43 (0.60)   | 8.64 (0.13)    | 3.39e-04 |
| P                               | 8.14 (0.55)    | 8.26 (0.15)    | 4.50e-01 | P                              | 9.00 (1.68)    | 8.35 (0.15)    | 4.42e-01 |
| Q                               | 8.73 (0.57)    | 8.12 (0.11)    | 2.32e-01 | Q                              | 10.43 (0.26)   | 9.71 (0.09)    | 7.16e-04 |
| S                               | 8.00 (0.17)    | 8.90 (0.29)    | 2.83e-01 | S                              | 9.17 (0.40)    | 8.85 (0.16)    | 1.83e-02 |
| T                               | 8.25 (0.75)    | 8.63 (0.15)    | 4.69e-01 | T                              | 8.89 (0.46)    | 9.82 (0.31)    | 2.39e-01 |
| <i>Mus musculus</i>             |                |                |          | <i>Homo sapiens</i>            |                |                |          |
| Amino acid                      | Triplet length | Variant length | p-value  | Amino acid                     | Triplet length | Variant length | p-value  |
| A                               | 9.68 (0.62)    | 9.41 (0.16)    | 4.49e-01 | A                              | 10.98 (0.50)   | 9.16 (0.15)    | 5.43e-05 |
| D                               | 8.67 (0.67)    | 8.85 (0.38)    | 2.72e-01 | D                              | 10.62 (0.94)   | 7.67 (0.19)    | 3.86e-03 |
| E                               | 11.20 (0.73)   | 9.35 (0.16)    | 1.48e-03 | E                              | 9.81 (0.41)    | 9.11 (0.16)    | 2.04e-02 |
| G                               | 11.42 (0.76)   | 8.87 (0.21)    | 9.65e-05 | G                              | 10.54 (0.65)   | 8.74 (0.18)    | 3.21e-04 |
| H                               | 13.75 (3.15)   | 9.23 (0.28)    | 2.33e-02 | H                              | 9.36 (0.49)    | 8.69 (0.17)    | 2.49e-01 |
| K                               | 8.33 (1.33)    | 7.78 (0.11)    | 4.48e-01 | K                              | 9.25 (0.48)    | 7.82 (0.09)    | 3.00e-03 |
| L                               | 9.43 (0.65)    | 7.67 (0.09)    | 2.10e-04 | L                              | 8.44 (0.22)    | 7.68 (0.09)    | 1.71e-04 |
| N                               | 8.00 (0.00)    | na (na)        | na       | N                              | 7.50 (0.50)    | na (na)        | na       |
| P                               | 9.95 (0.75)    | 9.07 (0.14)    | 1.33e-01 | P                              | 11.05 (1.04)   | 8.48 (0.12)    | 1.43e-03 |
| Q                               | 11.87 (0.54)   | 11.50 (0.58)   | 4.35e-02 | Q                              | 15.28 (0.78)   | 10.41 (0.66)   | 4.00e-10 |
| S                               | 12.32 (1.43)   | 10.39 (0.42)   | 5.48e-02 | S                              | 14.50 (1.94)   | 9.55 (0.29)    | 2.05e-03 |
| T                               | 11.17 (0.79)   | 8.03 (0.19)    | 5.72e-04 | T                              | 9.75 (1.38)    | 8.00 (0.41)    | 1.15e-01 |
